# Supplementary material for: Genetic background mutations drive neural circuit hyperconnectivity in a fragile X syndrome model
Source: BMC Biol. 2020 Jul 30;18:94. doi: 10.1186/s12915-020-00817-0 (PMC7392683; doi:10.1186/s12915-020-00817-0)
Supplement: Supplementary file 1 — Additional file 1: Table S1. List of Drosophila stocks used in this study. Stocks used in this study are listed by full genotype, Bloomington stock identification number, a brief description of purpose in study, and a reference. Numerous lines were recombined for the purpose of this study and do not have an associated reference. [file 12915_2020_817_MOESM1_ESM.xlsx]

## Sheet: Sheet1
Genotype	RRID	Purpose	Reference
w1118	BDSC_3605	Genetic control
w1118; dfmr150M/TM6B, tb, hu, gfp	BDSC_6930	dfmr1 null	Zhang et al., 2001
w1118; dfmr12/TM6, hu		dfmr1 null	Dockendorff et al., 2002
w1118; dfmr13/TM6, hu		dfmr1 null	Dockendorff et al., 2002
w1118; dfmr1B55		dfmr1 null in brain tissue	Inoue et al., 2002
w1118; Df(3R)BSC621/TM6C, cu1 sb1	BDSC_25696	dfmr1 deficiency	Cook et al., 2012
shakB2		GFI gap junction null	Blagburn et al., 1999
shakB2; dfmr150M/TM6B, tb, hu, gfp		GFI gap junction null, dfmr1 null
w1118; P{GMR91H05-Gal4}attP2	BDSC_40594	GFI Gal4 driver line	Lee and Godenschwege, 2014
w1118; P{GMR91H05-Gal4}attP2; dfmr150M/TM6B, tb, hu, gfp		GFI Gal4 driver line, dfmr1 null
dfmr1.14/CyO, gfp; dfmr150M/ TM6, tb, sb		dfmr1 genetic rescue, dfmr1 null	Dockendorff et al., 2002
w1118; P{GMR73C07-Gal4}attP2	BDSC_46689	GFC2 Gal4 driver line	Kennedy and Broadie, 2018
w1118; P{GMR24H07-Gal4}attP2	BDSC_49317	GFC3 Gal4 driver line	Kennedy and Broadie, 2018
w1118; elav-Gal4	BDSC_8765	Pan neural Gal4 driver line	Luo et al., 1994
w*; P{da.G32-Gal4}UH1	BDSC_55851	Pan organismal Gal4 driver line	Wodarz et al., 1995
w1118, y1; 10X UAS-ivs-mcd8::gfp attP40	BDSC_32186	UAS driven membrane bound GFP	Pfeiffer et al., 2010
w*; P{UAS-ivs-mcd8::rfp}attP40	BDSC_32219	UAS driven membrane bound RFP	Pfeiffer et al., 2010
w1118, y1; 10X UAS-ivs-mcd8::gfp attP40; dfmr150M/TM6B, tb, hu, gfp		UAS driven membrane bound GFP, dfmr1 null
y1, sc*, v1; TRiP.HMS00248	BDSC_34944	dfmr1 RNAi1	Perkins et al., 2015
y1, sc*, v1; P{y[+t7.7] v[+t1.8] TRiP.GL00075	BDSC_35200	dfmr1 RNAi2	Perkins et al., 2015
w*; PBac{brp(FRT.Stop)gfp} (Brp-FSF-GFP)	BDSC_55753	Flp conditional endogenous Brp label	Chen et al., 2014
y1 w*; P{UAS-flp1.D}	BDSC_4539	UAS driven flippase	Duffy et al., 1998
UAS-flp1.D/CyO, gfp; 91H05-Gal4		GFI Gal4 driver line, UAS driven flippase
10X UAS-ivs-mcd8::gfp attP40/CyO, gfp; Brp-FSF-GFP		UAS driven membrane bound RFP, flp conditional endogenous Brp label
UAS-flp1.D; 91H05-Gal4, dfmr150M/TM6B, tb, hu, gfp		GFI Gal4 driver line, UAS driven flippase, dfmr1 null
10X UAS-ivs-mcd8::gfp attP40; Brp-FSF, dfmr150M/TM6, tb, sb		UAS driven membrane bound RFP, flp conditional endogenous Brp label, dfmr1 null
