# Supplementary material for: Genetic background mutations drive neural circuit hyperconnectivity in a fragile X syndrome model
Source: BMC Biol. 2020 Jul 30;18:94. doi: 10.1186/s12915-020-00817-0 (PMC7392683; doi:10.1186/s12915-020-00817-0)
Supplement: Supplementary file 2 — Additional file 2: Table S2. List of protein coding genes and miRNAs in the 8 QTLs. Protein coding genes and miRNAs are listed on separate tabs for each QTL associated with the synaptic projection phenotype. Each tab contains the QTL chromosome and range. The genes are listed in order of their coordinates, with strand indicated by + or -. [file 12915_2020_817_MOESM2_ESM.xlsx]

## Sheet: Locus 1
Locus	1
Chromosome	2L
Range	6,720,000-10,190,000
Protein Coding Genes				miRNAs
Sequence Coordinates	Strand	Gene name		Sequence Coordinates	Strand	Gene name
2L:10,003,832..10,007,861	+	Ndf		2L:6,902,077..6,902,098	+	mir-932
2L:10,009,381..10,012,118	+	Trp1		2L:7,425,814..7,425,836	+	mir-275
2L:10,013,227..10,017,463	-	CG13131		2L:7,425,979..7,426,001	+	mir-305
2L:10,026,676..10,029,298	+	CG13127		2L:8,141,568..8,141,589	-	mir-4984
2L:10,032,690..10,038,954	+	obst-B		2L:8,258,623..8,258,645	-	mir-2b-1
2L:10,049,580..10,050,956	+	CG33301		2L:9,950,433..9,950,456	-	mir-87
2L:10,054,213..10,055,935	+	Cpr31A
2L:10,056,900..10,060,095	+	Pen
2L:10,060,816..10,063,925	+	Spn31A
2L:10,064,121..10,180,256	-	CG44153
2L:10,091,208..10,092,389	-	CG13133
2L:10,094,088..10,125,736	+	CG34109
2L:10,122,129..10,122,771	-	CG13135
2L:10,144,776..10,155,510	+	CG4839
2L:10,172,702..10,174,090	+	CG13137
2L:10,182,557..10,199,117	-	Sur
2L:10,189,820..10,191,496	-	Fum4
2L:6,719,394..6,723,359	-	homer
2L:6,723,903..6,731,345	+	Liprin-alpha
2L:6,732,866..6,736,149	+	TTLL3B
2L:6,736,364..6,740,188	-	TTLL3A
2L:6,742,502..6,755,390	+	meng
2L:6,744,663..6,745,622	-	CG31910
2L:6,747,421..6,747,914	-	CG44271
2L:6,757,864..6,759,628	-	CG11322
2L:6,759,829..6,770,968	-	LUBEL
2L:6,774,041..6,778,444	+	CG17378
2L:6,778,555..6,786,861	-	nrv1
2L:6,789,770..6,794,599	-	nrv2
2L:6,799,196..6,799,600	+	CG43610
2L:6,799,946..6,800,834	-	CG17376
2L:6,801,358..6,802,840	-	CG17377
2L:6,803,011..6,804,372	+	CG11236
2L:6,804,324..6,805,792	-	CG17375
2L:6,821,934..6,838,995	+	sens-2
2L:6,852,315..6,853,866	+	Rca1
2L:6,854,142..6,860,849	+	l(2)k09022
2L:6,860,905..6,870,389	-	Nha1
2L:6,874,900..6,906,656	+	Nlg2
2L:6,906,666..6,907,844	-	CG13773
2L:6,908,083..6,911,057	+	Rat1
2L:6,911,090..6,914,138	-	Wee1
2L:6,914,301..6,920,210	-	x16
2L:6,915,581..6,916,445	-	CG32829
2L:6,916,753..6,918,743	-	nop5
2L:6,920,704..6,926,046	+	Hrb27C
2L:6,932,121..6,932,552	+	CG43232
2L:6,932,545..6,942,814	-	CG18304
2L:6,943,178..6,945,289	-	Fgop2
2L:6,945,464..6,948,808	-	ihog
2L:6,949,310..6,950,207	-	Gas41
2L:6,950,421..6,954,586	+	SA
2L:6,954,357..6,956,950	-	CG13775
2L:6,957,008..6,959,104	+	CG3430
2L:6,959,099..6,960,328	-	Atac1
2L:6,960,377..6,961,555	+	Hmgcl
2L:6,961,516..6,963,619	-	sip2
2L:6,964,421..6,965,812	+	Coprox
2L:6,966,780..6,967,590	-	smt3
2L:6,968,711..6,971,737	-	snRNP-U1-70K
2L:6,972,828..7,009,909	-	uif
2L:7,012,262..7,012,803	+	CG43321
2L:7,013,396..7,014,737	+	CG43322
2L:7,014,623..7,023,898	-	Gart
2L:7,021,682..7,022,470	+	Pcp
2L:7,024,829..7,027,287	-	CG31908
2L:7,027,526..7,028,959	+	MME1
2L:7,030,493..7,032,606	-	Rab30
2L:7,032,721..7,037,613	+	Caper
2L:7,037,823..7,054,847	+	milt
2L:7,056,301..7,059,294	+	Mnn1
2L:7,059,214..7,060,851	-	Mst27D
2L:7,063,986..7,064,467	+	Sem1
2L:7,064,431..7,065,837	-	Nuf2
2L:7,067,983..7,069,546	+	Ugt307A1
2L:7,069,536..7,084,635	-	Pvf2
2L:7,098,188..7,133,527	-	Pvf3
2L:7,182,234..7,185,519	+	MICU1
2L:7,185,461..7,188,068	-	CG4496
2L:7,190,431..7,194,413	-	CG4497
2L:7,194,908..7,204,264	-	CG4502
2L:7,204,538..7,220,033	-	CG13784
2L:7,220,369..7,223,081	-	mEFG1
2L:7,223,328..7,240,503	-	Ndae1
2L:7,227,734..7,228,641	+	CG43799
2L:7,232,165..7,232,813	-	CG43800
2L:7,250,607..7,252,982	-	CG13786
2L:7,255,419..7,277,171	-	Wnt4
2L:7,257,512..7,258,198	+	CG31909
2L:7,307,159..7,316,265	+	wg
2L:7,333,714..7,352,524	+	Wnt6
2L:7,363,379..7,377,528	+	Wnt10
2L:7,377,702..7,384,344	+	ninaC
2L:7,384,486..7,388,253	-	CG5149
2L:7,388,508..7,390,902	+	gudu
2L:7,390,984..7,395,601	-	CG5160
2L:7,401,335..7,404,526	+	CG5171
2L:7,405,227..7,408,475	+	CG5177
2L:7,408,533..7,409,809	-	CG5181
2L:7,410,909..7,412,229	+	CG15818
2L:7,412,417..7,417,813	+	chm
2L:7,426,866..7,430,329	+	muc
2L:7,430,530..7,433,516	-	CG5958
2L:7,437,492..7,445,269	+	CG5973
2L:7,445,355..7,451,244	-	santa-maria
2L:7,452,520..7,454,212	-	Gr28a
2L:7,454,826..7,456,477	-	Gr28b
2L:7,466,543..7,472,493	+	CG6055
2L:7,472,513..7,496,307	-	Ziz
2L:7,474,704..7,476,493	+	CG6441
2L:7,496,791..7,497,365	-	Obp28a
2L:7,497,805..7,530,574	-	RapGAP1
2L:7,581,924..7,583,271	+	Spn28B
2L:7,605,600..7,607,701	+	Cyp4d21
2L:7,608,389..7,616,533	+	CG6739
2L:7,642,005..7,675,078	-	Slob
2L:7,666,047..7,684,537	+	Myo28B1
2L:7,689,311..7,691,061	-	CG18585
2L:7,691,109..7,692,683	-	CG7025
2L:7,693,030..7,693,821	+	CG43235
2L:7,693,727..7,701,601	-	Tep2
2L:7,702,805..7,710,690	+	Tep3
2L:7,710,880..7,713,991	+	Ntl
2L:7,713,998..7,716,645	-	CG33296
2L:7,716,974..7,719,487	-	CG13793
2L:7,719,847..7,722,823	-	CG13794
2L:7,723,045..7,726,298	-	CG13795
2L:7,727,157..7,732,670	-	CG13796
2L:7,734,415..7,738,809	-	CG31904
2L:7,740,562..7,741,537	-	Acp1
2L:7,743,682..7,744,839	-	CG7214
2L:7,747,275..7,747,874	+	ATPsynGL
2L:7,752,170..7,753,153	-	CG7203
2L:7,754,174..7,765,716	+	CG46025
2L:7,767,628..7,775,033	+	CG7191
2L:7,775,804..7,778,029	-	CG7179
2L:7,780,085..7,781,415	+	Uro
2L:7,781,465..7,782,550	+	CG7164
2L:7,782,865..7,786,061	+	CG7154
2L:7,786,160..7,790,557	-	CG7149
2L:7,791,175..7,795,959	-	LKRSDH
2L:7,796,314..7,800,058	-	Herp
2L:7,800,147..7,801,575	+	r2d2
2L:7,801,668..7,810,703	-	cdc14
2L:7,811,438..7,820,771	+	LanB1
2L:7,821,151..7,825,350	+	CG7115
2L:7,825,347..7,827,246	-	Rack1
2L:7,827,650..7,833,576	+	mts
2L:7,840,452..7,841,262	+	CG14537
2L:7,844,905..7,855,255	-	CG14535
2L:7,857,077..7,858,136	+	lectin-28C
2L:7,857,957..7,860,839	-	TwdlE
2L:7,864,642..7,871,341	-	Proc
2L:7,873,495..7,879,552	-	spz3
2L:7,883,282..7,887,513	-	CG7102
2L:7,884,930..7,885,450	-	SmE
2L:7,885,503..7,886,109	+	CG34132
2L:7,887,693..7,889,129	-	Spn28Da
2L:7,889,288..7,890,704	-	Spn28Db
2L:7,891,187..7,984,196	-	Snoo
2L:7,983,946..7,986,785	+	CG7231
2L:7,986,786..7,994,184	-	pes
2L:7,994,388..7,997,704	-	CG7227
2L:7,998,869..7,999,676	+	Sirup
2L:7,999,670..8,004,286	-	Wwox
2L:8,004,548..8,007,210	-	Spn28Dc
2L:8,008,302..8,009,477	-	CG12560
2L:8,009,603..8,010,652	-	Glyat
2L:8,011,405..8,026,898	+	Tg
2L:8,026,914..8,028,379	-	CG7367
2L:8,029,462..8,030,150	+	baf
2L:8,030,721..8,038,453	+	Cka
2L:8,041,106..8,041,879	+	CCDC53
2L:8,041,873..8,042,909	-	RpL36A
2L:8,043,471..8,054,326	+	Megf8
2L:8,054,322..8,071,624	-	poe
2L:8,071,812..8,072,848	-	MED20
2L:8,072,895..8,073,948	+	Trf
2L:8,074,117..8,082,982	-	Mcr
2L:8,083,420..8,109,458	+	Bsg
2L:8,116,965..8,124,010	-	mon2
2L:8,124,329..8,125,799	+	CG8673
2L:8,125,668..8,126,890	-	CG12375
2L:8,127,001..8,133,989	+	CG8668
2L:8,134,247..8,155,905	-	PAPLA1
2L:8,143,401..8,144,047	-	CG42762
2L:8,144,391..8,145,107	-	CG42763
2L:8,145,758..8,155,603	+	CG43394
2L:8,147,611..8,148,356	+	CG31606
2L:8,159,832..8,161,800	+	Rbsn-5
2L:8,161,796..8,162,418	-	Acbp1
2L:8,163,073..8,190,137	+	Piezo
2L:8,190,297..8,190,781	-	CG34134
2L:8,190,808..8,196,918	-	CG8475
2L:8,197,193..8,198,813	+	CG8460
2L:8,198,882..8,200,652	+	PGAP5
2L:8,200,465..8,205,132	-	SLC5A11
2L:8,206,171..8,209,637	+	CG8419
2L:8,209,626..8,211,122	-	Su(var)205
2L:8,211,347..8,211,938	+	Ssb-c31a
2L:8,212,039..8,212,902	-	CG8372
2L:8,212,959..8,214,135	+	CG8360
2L:8,214,045..8,215,239	+	CG8353
2L:8,215,915..8,216,901	+	CG8349
2L:8,216,851..8,218,017	-	CG8292
2L:8,218,071..8,220,741	-	Snx6
2L:8,220,980..8,239,878	-	Pvr
2L:8,240,414..8,241,800	-	Spn28F
2L:8,242,486..8,243,426	+	CG14277
2L:8,243,323..8,244,003	-	CG43057
2L:8,244,160..8,252,966	-	CG8086
2L:8,258,373..8,300,746	-	Btk29A
2L:8,301,345..8,302,985	-	wol
2L:8,303,429..8,305,376	+	Scgalpha
2L:8,305,586..8,306,741	+	CG7840
2L:8,306,696..8,308,192	-	Ostgamma
2L:8,308,427..8,309,961	+	Mettl14
2L:8,309,876..8,311,195	-	CG7810
2L:8,311,399..8,317,011	+	CG7806
2L:8,316,889..8,319,908	-	mtsh
2L:8,320,328..8,321,285	+	strat
2L:8,321,280..8,325,262	-	CG7781
2L:8,327,456..8,332,911	+	CG14275
2L:8,338,287..8,342,056	+	CG14274
2L:8,342,695..8,344,378	+	CG14273
2L:8,346,620..8,350,197	+	CG7778
2L:8,352,187..8,355,172	+	Mur29B
2L:8,355,678..8,362,469	-	CG7627
2L:8,363,477..8,364,662	-	RpS13
2L:8,364,855..8,365,663	+	CSN8
2L:8,366,038..8,370,082	+	Pp2A-29B
2L:8,370,454..8,374,250	+	CG17292
2L:8,374,461..8,375,549	+	Wdr82
2L:8,375,502..8,376,797	-	CG13390
2L:8,377,035..8,378,206	+	CG17294
2L:8,378,262..8,381,588	-	AlaRS
2L:8,381,821..8,382,807	-	CG13392
2L:8,382,861..8,383,657	+	Rcd4
2L:8,383,612..8,384,137	-	Dad1
2L:8,384,455..8,388,804	+	CG13384
2L:8,388,728..8,389,331	-	CG42819
2L:8,389,881..8,392,398	-	CG42820
2L:8,392,456..8,393,222	-	Acp29AB
2L:8,393,489..8,394,280	-	lectin-29Ca
2L:8,394,446..8,394,940	-	Peritrophin-15b
2L:8,395,665..8,396,096	-	Peritrophin-15a
2L:8,396,649..8,397,886	+	CG13385
2L:8,399,021..8,400,078	+	CG13386
2L:8,400,421..8,401,592	+	CG31898
2L:8,401,476..8,403,139	-	fy
2L:8,403,573..8,408,280	+	emb
2L:8,408,888..8,411,608	-	CG13397
2L:8,412,144..8,415,256	-	CG13398
2L:8,415,690..8,430,977	+	Akap200
2L:8,431,086..8,433,598	-	grk
2L:8,434,058..8,437,365	-	D12
2L:8,437,405..8,437,996	+	Chrac-14
2L:8,438,169..8,442,342	+	mus201
2L:8,442,447..8,445,815	+	CG31897
2L:8,445,861..8,449,576	-	Aasdh
2L:8,449,691..8,451,090	-	Agpat2
2L:8,464,488..8,466,529	+	prg
2L:8,466,817..8,488,671	+	d
2L:8,477,349..8,478,088	+	CheA29a
2L:8,482,374..8,483,005	+	CG43796
2L:8,488,981..8,490,546	+	CG13088
2L:8,490,739..8,491,360	+	CG43400
2L:8,491,868..8,506,845	-	Dh31
2L:8,494,893..8,496,307	-	Bace
2L:8,509,069..8,511,866	-	CG13096
2L:8,512,174..8,514,868	-	CG13097
2L:8,515,096..8,516,755	+	PIG-U
2L:8,516,753..8,517,380	-	mRpL51
2L:8,517,411..8,519,176	+	Uba4
2L:8,519,690..8,521,731	+	Sgp
2L:8,521,933..8,524,884	+	Acer
2L:8,524,999..8,528,505	-	lmgA
2L:8,524,999..8,528,505	-	lmgB
2L:8,529,141..8,537,932	+	CG17834
2L:8,542,147..8,671,917	+	Sema1a
2L:8,672,698..8,676,804	+	Glt
2L:8,676,777..8,679,812	-	CG9287
2L:8,681,325..8,684,376	-	CG9289
2L:8,684,823..8,685,955	-	PrBP
2L:8,686,231..8,687,052	+	Trs23
2L:8,687,226..8,709,042	-	Hnf4
2L:8,705,572..8,707,440	+	CG9314
2L:8,709,880..8,714,583	-	raw
2L:8,751,715..8,752,122	-	CG45307
2L:8,752,285..8,753,209	+	CG12438
2L:8,765,273..8,768,710	-	LManIII
2L:8,769,159..8,772,344	-	LManIV
2L:8,772,946..8,776,263	-	LManV
2L:8,777,661..8,781,252	-	LManVI
2L:8,781,799..8,782,500	-	CG42710
2L:8,825,645..8,829,670	+	SoxN
2L:8,862,776..8,863,743	+	CG32986
2L:8,863,811..8,864,847	+	CG32987
2L:8,864,864..8,865,692	+	CG32988
2L:8,865,850..8,866,670	+	CG32983
2L:8,866,767..8,867,686	+	CG9483
2L:8,891,440..8,891,930	+	CG42713
2L:8,898,786..8,932,700	+	CG34398
2L:8,933,962..8,936,096	+	Tsp29Fa
2L:8,937,390..8,939,743	+	Tsp29Fb
2L:8,939,725..8,941,763	-	Argl
2L:8,941,945..8,943,257	-	CG9515
2L:8,943,455..8,946,613	-	C1GalTA
2L:8,947,266..8,947,871	+	CG46397
2L:8,953,481..8,955,807	-	CG31886
2L:8,959,255..8,962,354	-	CG9525
2L:8,962,533..8,964,620	+	CG32985
2L:8,964,957..8,967,035	+	CG32984
2L:8,967,535..8,970,043	+	CG18088
2L:8,970,520..8,974,976	-	CG9541
2L:8,977,834..8,984,872	-	CG13101
2L:8,980,659..8,981,432	+	CG18662
2L:8,985,936..8,989,182	-	rost
2L:8,991,735..8,993,632	+	CG9555
2L:8,993,818..8,997,379	-	alien
2L:8,994,391..8,995,617	+	CG17906
2L:8,997,605..8,998,544	+	CG18661
2L:8,998,537..8,999,468	+	Try29F
2L:9,010,583..9,011,358	+	CG9568
2L:9,012,188..9,012,890	+	CG13102
2L:9,012,885..9,014,068	-	Rcd-1r
2L:9,024,320..9,031,836	-	CG9582
2L:9,051,631..9,071,164	-	DIP-zeta
2L:9,077,121..9,077,988	+	CG12439
2L:9,084,107..9,089,440	+	Toll-4
2L:9,097,563..9,098,175	+	CG31609
2L:9,111,814..9,113,285	+	Or30a
2L:9,125,737..9,163,716	+	CG32982
2L:9,164,235..9,165,426	+	CG13108
2L:9,165,421..9,166,514	-	CG9586
2L:9,166,778..9,247,186	+	tai
2L:9,250,048..9,251,042	-	aust
2L:9,251,472..9,253,118	-	borr
2L:9,254,076..9,254,854	-	lectin-30A
2L:9,256,563..9,291,798	+	Ggamma30A
2L:9,327,744..9,330,067	+	CG17005
2L:9,330,763..9,331,981	+	Cks30A
2L:9,333,567..9,341,925	+	Eaat1
2L:9,342,832..9,344,491	+	CG3748
2L:9,349,546..9,349,921	+	CG43350
2L:9,350,470..9,350,996	+	CG13110
2L:9,367,640..9,368,434	+	CG34181
2L:9,370,309..9,415,156	-	Shawl
2L:9,387,389..9,391,567	+	Aldh
2L:9,396,999..9,397,988	-	CG4438
2L:9,416,588..9,426,342	+	Mco1
2L:9,426,784..9,427,917	+	Fbp2
2L:9,427,870..9,428,740	+	CG42847
2L:9,428,669..9,431,052	-	FucTB
2L:9,431,405..9,435,341	+	scat
2L:9,435,399..9,436,842	+	CG3769
2L:9,436,804..9,437,227	+	RpS28-like
2L:9,437,469..9,463,123	+	numb
2L:9,440,011..9,440,740	-	CG33723
2L:9,491,176..9,494,796	-	Gdi
2L:9,495,474..9,520,696	+	CG33298
2L:9,521,210..9,540,045	+	Oatp30B
2L:9,528,515..9,529,648	+	CG31883
2L:9,540,523..9,542,480	+	CG17855
2L:9,542,878..9,543,658	+	Cpr30B
2L:9,544,171..9,544,875	+	CG13113
2L:9,545,811..9,547,424	+	CG13114
2L:9,547,720..9,566,750	-	jp
2L:9,548,258..9,565,438	-	CG46468
2L:9,568,890..9,573,572	+	brwl
2L:9,573,563..9,576,769	-	Mtpalpha
2L:9,578,120..9,579,638	-	CG31709
2L:9,579,498..9,581,745	-	gcm
2L:9,589,476..9,591,783	+	CG3841
2L:9,598,880..9,600,872	-	CG4382
2L:9,608,562..9,612,706	+	gcm2
2L:9,613,166..9,616,404	+	Trx-2
2L:9,616,469..9,623,109	+	GlcAT-S
2L:9,624,452..9,625,285	-	CG31882
2L:9,634,179..9,656,026	+	Apoltp
2L:9,656,600..9,657,424	+	CG33299
2L:9,682,315..9,699,297	-	Pka-C1
2L:9,699,791..9,700,459	+	hoip
2L:9,700,810..9,708,883	+	pelo
2L:9,702,442..9,705,954	-	CG31710
2L:9,708,921..9,711,271	-	CG4364
2L:9,711,512..9,746,495	-	Nckx30C
2L:9,729,940..9,730,910	+	CG13116
2L:9,736,645..9,737,329	+	CG13117
2L:9,747,839..9,750,071	-	Cyp4e3
2L:9,758,342..9,762,375	+	zf30C
2L:9,762,424..9,763,262	-	Taf11
2L:9,763,369..9,765,338	+	und
2L:9,765,357..9,770,996	-	ppk18
2L:9,767,058..9,768,727	+	CG4017
2L:9,769,060..9,770,409	+	CG17633
2L:9,771,155..9,775,030	-	ppk16
2L:9,771,155..9,775,030	-	ppk11
2L:9,782,384..9,788,499	+	IP3K1
2L:9,790,882..9,791,958	+	CG4036
2L:9,791,961..9,793,107	-	CG13123
2L:9,793,317..9,886,250	-	nAChRalpha6
2L:9,888,005..9,890,119	+	Fkbp59
2L:9,890,061..9,890,772	-	CG34183
2L:9,890,885..9,891,336	+	CG4537
2L:9,891,255..9,893,446	-	mtDNA-helicase
2L:9,895,287..9,896,104	+	Bka
2L:9,896,265..9,897,521	-	RpS2
2L:9,897,820..9,903,128	-	Muc30E
2L:9,903,279..9,908,633	-	CG13124
2L:9,908,830..9,912,608	-	Etl1
2L:9,912,911..9,915,044	+	Srp54
2L:9,915,253..9,917,220	+	yip2
2L:9,917,221..9,918,176	-	CG5885
2L:9,918,618..9,919,901	+	CG4598
2L:9,920,160..9,921,459	+	CG4594
2L:9,921,633..9,922,766	+	CG4592
2L:9,922,737..9,924,865	-	TbCMF46
2L:9,925,161..9,930,378	+	CG42366
2L:9,930,580..9,931,131	+	CG42367
2L:9,932,272..9,933,163	-	Cpr30F
2L:9,934,767..9,938,134	-	CG31712
2L:9,938,178..9,938,790	-	Apf
2L:9,938,863..9,940,845	+	CG4619
2L:9,940,773..9,947,407	-	CG5853
2L:9,952,072..9,954,181	-	CG13126
2L:9,954,325..9,956,176	+	CG4709
2L:9,956,175..9,957,019	-	CG5846
2L:9,957,132..9,960,168	+	CG4658
2L:9,959,248..9,963,755	-	CG5850
2L:9,964,147..9,967,229	-	Dref
2L:9,967,313..9,968,491	+	RpL13
2L:9,984,645..9,995,538	+	bib
2L:9,995,561..10,002,736	-	CG31875
2L:9,996,706..10,002,736	-	SoYb

## Sheet: Locus 2
Locus	2
Chromosome	2R
Range	15,270,000-16,980,000
Protein Coding Genes				miRNAs
Sequence Coordinates	Strand	Gene name		Sequence Coordinates	Strand	Gene name
2R:15,262,808..15,309,368	-	Trpm		2R:15,657,083..15,657,105	+	mir-278
2R:15,296,764..15,298,329	-	ND-51L2		2R:15,945,887..15,945,907	+	mir-4919
2R:15,309,931..15,311,134	-	CG8152		2R:16,065,307..16,065,329	-	mir-137
2R:15,311,510..15,312,964	+	Xpc		2R:16,831,484..16,831,506	+	mir-8
2R:15,317,817..15,322,171	-	CG8155		2R:16,895,237..16,895,260	-	mir-990
2R:15,322,501..15,325,490	+	Arf51F
2R:15,325,900..15,326,386	-	CG8157
2R:15,327,143..15,328,271	-	CG8160
2R:15,331,325..15,339,384	+	Hr51
2R:15,340,472..15,368,300	+	unc-5
2R:15,368,074..15,371,520	-	Pms2
2R:15,376,619..15,380,614	-	dup
2R:15,383,070..15,387,851	+	SRPK
2R:15,401,096..15,463,846	+	Stacl
2R:15,408,846..15,409,113	+	Mtk
2R:15,423,185..15,424,139	-	CG30472
2R:15,427,091..15,428,023	-	CG34188
2R:15,472,175..15,482,834	-	CG8180
2R:15,485,953..15,497,231	-	CG12964
2R:15,499,632..15,501,431	+	Ir52a
2R:15,501,820..15,503,610	+	Ir52b
2R:15,504,201..15,506,000	+	Ir52c
2R:15,506,582..15,508,366	+	Ir52d
2R:15,513,567..15,515,597	+	Pgant1
2R:15,517,707..15,532,259	-	Khc-73
2R:15,533,520..15,537,782	+	CG30471
2R:15,538,175..15,540,014	+	CG30467
2R:15,539,554..15,541,363	-	CG8187
2R:15,541,435..15,542,498	+	Vha36-1
2R:15,542,661..15,544,409	+	eIF2Bgamma
2R:15,544,316..15,549,984	-	CG8192
2R:15,556,928..15,562,436	+	CG12963
2R:15,562,697..15,565,801	-	CG8195
2R:15,566,271..15,569,404	-	Flo1
2R:15,569,528..15,571,417	-	Cdk5
2R:15,571,468..15,573,170	+	CG30466
2R:15,573,144..15,573,762	-	CG8204
2R:15,613,854..15,657,214	+	CG42524
2R:15,657,318..15,665,094	-	fus
2R:15,677,218..15,678,956	-	CG8207
2R:15,679,426..15,680,084	-	Vha14-1
2R:15,680,545..15,682,477	+	CG30091
2R:15,682,719..15,687,415	+	Impbeta11
2R:15,685,004..15,686,082	-	CG30082
2R:15,687,388..15,688,985	-	Cep89
2R:15,689,826..15,691,014	+	CG30090
2R:15,691,113..15,692,216	+	CG30088
2R:15,692,448..15,693,751	+	CG30087
2R:15,694,092..15,695,232	+	CG33460
2R:15,695,386..15,696,478	+	CG33461
2R:15,696,794..15,698,010	+	CG33462
2R:15,698,726..15,699,225	-	CG42662
2R:15,698,726..15,699,894	-	CG46433
2R:15,698,726..15,701,696	-	CG30080
2R:15,711,597..15,712,644	-	CG30083
2R:15,735,496..15,762,044	+	CG30089
2R:15,762,565..15,814,917	-	Zasp52
2R:15,780,840..15,814,917	-	Zasp52A
2R:15,819,114..15,821,114	-	CG33465
2R:15,826,693..15,835,055	-	Poxn
2R:15,844,098..15,847,362	-	CG8249
2R:15,848,579..15,855,645	+	tun
2R:15,855,961..15,857,522	+	CG12970
2R:15,857,752..15,861,718	-	Gpo1
2R:15,864,309..15,869,147	-	Rif1
2R:15,870,054..15,890,917	-	sli
2R:15,895,829..15,896,563	-	CG33463
2R:15,923,040..15,931,935	-	bdg
2R:15,932,170..15,934,825	-	Diap2
2R:15,934,825..15,935,938	+	bug
2R:15,935,893..15,940,073	-	Mlf
2R:15,940,610..15,941,483	-	CG8299
2R:15,942,864..15,947,266	+	Cyp4aa1
2R:15,944,028..15,944,567	+	COX6AL
2R:15,946,933..15,989,498	-	Strn-Mlck
2R:15,955,040..15,956,636	+	CG8366
2R:15,989,683..15,991,286	-	CG8314
2R:15,991,367..15,992,375	-	Pex11
2R:15,992,408..15,993,707	+	CG8320
2R:15,993,803..16,000,287	-	ATPCL
2R:16,001,181..16,006,901	+	Tmem131
2R:16,006,893..16,007,667	-	Ufc1
2R:16,009,401..16,011,438	-	CG8388
2R:16,011,680..16,013,815	+	CG8389
2R:16,013,805..16,014,787	-	Prosbeta1
2R:16,014,908..16,016,050	+	Rrp42
2R:16,016,042..16,017,154	-	EMC7
2R:16,017,737..16,024,627	+	CG8399
2R:16,024,628..16,028,043	-	casp
2R:16,028,603..16,030,091	+	CG8401
2R:16,031,930..16,047,243	+	SP2353
2R:16,047,648..16,059,466	+	CG8405
2R:16,081,667..16,098,564	-	Dg
2R:16,098,948..16,099,337	+	mRpL34
2R:16,099,306..16,102,608	-	CG8414
2R:16,103,466..16,106,489	+	Rho1
2R:16,107,440..16,110,017	-	Ric
2R:16,110,502..16,116,996	+	Asph
2R:16,117,109..16,119,149	+	Jhedup
2R:16,120,134..16,122,773	+	Jhe
2R:16,123,484..16,124,577	+	CG30095
2R:16,124,981..16,138,238	+	spin
2R:16,138,352..16,141,928	+	Got1
2R:16,142,202..16,142,935	+	CG30094
2R:16,143,147..16,145,906	+	CysRS
2R:16,145,904..16,148,719	-	sotv
2R:16,148,812..16,149,639	-	CG10731
2R:16,150,123..16,169,519	+	lbk
2R:16,157,267..16,158,794	-	CG10734
2R:16,169,600..16,170,861	-	CG8435
2R:16,171,112..16,178,307	-	Ptp52F
2R:16,178,826..16,185,103	+	Lis-1
2R:16,185,122..16,186,506	-	CG8441
2R:16,186,584..16,194,277	+	clu
2R:16,194,062..16,196,333	-	calypso
2R:16,196,384..16,196,928	+	CG44242
2R:16,197,042..16,199,378	+	CG42837
2R:16,197,340..16,199,555	+	CG44243
2R:16,199,426..16,202,884	-	Shark
2R:16,203,329..16,221,793	-	mrj
2R:16,222,112..16,222,627	-	CG7798
2R:16,223,218..16,230,680	-	CG15706
2R:16,226,501..16,229,869	+	Tsf3
2R:16,230,198..16,234,087	+	CG15701
2R:16,234,358..16,234,936	-	CG7786
2R:16,236,715..16,237,479	+	CG3687
2R:16,238,103..16,240,722	-	krimp
2R:16,240,936..16,241,934	-	CG15708
2R:16,243,145..16,249,795	-	CngA
2R:16,262,284..16,264,619	-	fidipidine
2R:16,264,652..16,266,959	+	csul
2R:16,266,960..16,271,971	-	Khc
2R:16,272,114..16,277,335	+	CG33017
2R:16,277,685..16,278,396	-	cato
2R:16,280,015..16,280,470	+	prim
2R:16,280,950..16,281,629	+	CG15705
2R:16,281,630..16,282,946	-	CG7755
2R:16,283,435..16,287,450	+	CG9068
2R:16,287,586..16,288,233	-	CG30324
2R:16,288,208..16,288,969	-	CG30099
2R:16,289,320..16,291,333	+	JhI-26
2R:16,291,453..16,292,269	+	CG42372
2R:16,291,453..16,292,269	+	CG30100
2R:16,292,264..16,294,130	-	CG7747
2R:16,294,400..16,297,232	+	Atg9
2R:16,309,149..16,316,485	+	Nox
2R:16,316,313..16,320,732	-	CG8060
2R:16,320,815..16,322,124	-	CG30096
2R:16,322,186..16,324,801	+	CG4282
2R:16,325,913..16,333,982	-	Vha44
2R:16,339,440..16,341,242	+	Hmgs
2R:16,341,251..16,343,522	-	CG7997
2R:16,344,377..16,345,828	+	Nup62
2R:16,345,838..16,347,500	-	wcd
2R:16,347,614..16,348,527	-	CG15710
2R:16,354,224..16,355,215	-	CG30098
2R:16,359,730..16,363,470	+	CG6262
2R:16,363,551..16,365,895	-	CG15711
2R:16,380,516..16,385,765	+	CG43187
2R:16,386,524..16,430,763	+	Sema2b
2R:16,414,815..16,417,150	-	Menl-2
2R:16,414,815..16,419,398	-	Menl-1
2R:16,432,244..16,433,183	+	jtb
2R:16,433,852..16,435,954	-	CG7848
2R:16,443,211..16,444,845	+	CG4409
2R:16,445,986..16,447,512	+	Parp16
2R:16,466,709..16,467,522	+	CheB53a
2R:16,468,209..16,468,934	+	CheB53b
2R:16,484,841..16,485,552	-	CG15712
2R:16,486,674..16,487,801	+	CG33458
2R:16,488,053..16,489,182	+	CG33459
2R:16,491,100..16,493,233	+	S-Lap8
2R:16,496,889..16,499,429	-	knon
2R:16,500,178..16,533,459	+	Sema2a
2R:16,534,943..16,536,964	+	loopin-1
2R:16,554,587..16,557,026	+	Syn2
2R:16,558,567..16,565,238	-	DAT
2R:16,566,023..16,570,120	+	CG4945
2R:16,570,196..16,571,230	-	RpS15
2R:16,572,082..16,574,154	+	CG4927
2R:16,574,579..16,576,586	-	Lst
2R:16,580,833..16,585,448	+	Cdk4
2R:16,586,129..16,586,732	+	RpLP2
2R:16,587,045..16,589,184	-	CG8311
2R:16,589,518..16,594,646	-	CG8306
2R:16,595,028..16,604,373	-	CG8303
2R:16,598,748..16,600,411	+	CG5089
2R:16,618,036..16,623,939	+	CG5065
2R:16,626,102..16,637,975	-	Alk
2R:16,641,243..16,651,125	+	gprs
2R:16,651,095..16,652,699	-	Amyrel
2R:16,653,205..16,655,046	-	Nach
2R:16,655,323..16,663,960	-	Picot
2R:16,670,398..16,671,836	+	CG34457
2R:16,672,033..16,672,889	+	CG34458
2R:16,673,461..16,731,384	-	Pgant9
2R:16,691,701..16,693,751	+	Idgf6
2R:16,744,295..16,745,114	-	Sfp53D
2R:16,745,223..16,746,579	-	CG15617
2R:16,748,060..16,748,590	-	Acp53C14a
2R:16,748,815..16,749,460	-	Acp53C14b
2R:16,749,803..16,750,335	-	Acp53Ea
2R:16,750,776..16,751,495	-	Acp53C14c
2R:16,751,503..16,772,500	-	unc-104
2R:16,754,444..16,754,925	+	CG34189
2R:16,755,073..16,755,823	+	CG5267
2R:16,765,361..16,766,000	-	CG42392
2R:16,766,804..16,769,238	+	CG5348
2R:16,772,916..16,773,915	-	Sod2
2R:16,774,246..16,775,676	+	Arp53D
2R:16,778,365..16,778,994	+	Vkor
2R:16,780,425..16,783,171	+	resilin
2R:16,787,175..16,792,472	+	CG5522
2R:16,792,642..16,793,179	+	CG15919
2R:16,793,119..16,796,407	-	CG15615
2R:16,816,589..16,817,577	+	CG5550
2R:16,825,530..16,826,648	+	CG34459
2R:16,826,872..16,827,755	+	CG34460
2R:16,843,296..16,845,038	-	Ugt37C1
2R:16,850,437..16,854,104	+	IntS8
2R:16,854,025..16,855,464	-	Fen1
2R:16,856,220..16,860,358	+	Dek
2R:16,862,634..16,867,714	-	Psi
2R:16,868,222..16,869,280	+	eEF1beta
2R:16,869,402..16,871,851	+	CG6426
2R:16,872,250..16,872,906	+	CG6421
2R:16,873,015..16,873,755	+	CG6429
2R:16,873,772..16,874,977	+	CG6435
2R:16,874,724..16,895,652	-	CG8910
2R:16,880,713..16,884,695	+	CG6472
2R:16,898,535..16,901,575	+	inaC
2R:16,925,127..16,943,107	+	Pkc53E
2R:16,937,597..16,938,011	+	CG43788
2R:16,938,696..16,938,995	+	CG43789
2R:16,945,555..16,947,231	+	CG15614
2R:16,946,455..16,947,554	-	CG34190
2R:16,947,658..16,948,224	-	Vha16-4
2R:16,948,296..16,955,266	-	mute
2R:16,952,005..16,952,581	+	Ufm1
2R:16,955,458..16,957,308	+	PIG-V
2R:16,957,465..16,958,927	+	CG6665
2R:16,958,943..16,960,195	-	CG9010
2R:16,973,927..16,996,057	+	Cbp53E

## Sheet: Locus 3
Locus	3
Chromosome	3L
Range	8,560,000-8,910,000
Protein Coding Genes				miRNAs
Sequence Coordinates	Strand	Gene name		Sequence Coordinates	Strand	Gene name
3L:8,545,001..8,570,732	+	rhea		3L:8,571,863..8,571,884	+	mir-190
3L:8,574,407..8,576,078	-	CG6638
3L:8,578,742..8,599,617	+	CG43078
3L:8,599,442..8,600,879	-	Nelf-E
3L:8,601,006..8,602,392	+	RpL14
3L:8,602,411..8,604,149	-	CG5989
3L:8,604,657..8,617,074	+	CG6282
3L:8,617,235..8,619,474	+	S-Lap1
3L:8,619,888..8,622,091	+	S-Lap2
3L:8,622,039..8,623,901	-	GAPsec
3L:8,630,243..8,638,813	+	Zasp66
3L:8,631,509..8,634,069	-	Cdc6
3L:8,640,439..8,643,584	+	Cpr66D
3L:8,644,916..8,646,822	-	CG13305
3L:8,647,145..8,651,011	+	Pex7
3L:8,647,261..8,648,936	-	Arr2
3L:8,675,759..8,679,253	+	h
3L:8,719,100..8,720,225	-	SrpRbeta
3L:8,720,280..8,721,126	-	CG32022
3L:8,721,502..8,726,108	+	CG6511
3L:8,725,520..8,725,774	-	CG43965
3L:8,726,791..8,727,613	+	Cp18
3L:8,728,481..8,729,066	+	Cp15
3L:8,729,865..8,730,604	+	Cp19
3L:8,731,944..8,732,599	+	Cp16
3L:8,732,858..8,738,907	-	Prm
3L:8,749,139..8,749,726	-	CG13306
3L:8,755,989..8,757,167	+	CG6576
3L:8,766,442..8,798,719	+	Fhos
3L:8,788,144..8,788,545	-	Acbp5
3L:8,798,730..8,800,532	-	CG13310
3L:8,801,540..8,802,164	-	CG13311
3L:8,802,463..8,803,599	+	CG34426
3L:8,803,602..8,804,182	-	CG32023
3L:8,804,764..8,805,812	+	CG34427
3L:8,805,811..8,807,213	-	CG13312
3L:8,807,601..8,808,407	+	CG32024
3L:8,808,544..8,809,307	+	CG13308
3L:8,810,395..8,811,265	+	CG13309
3L:8,827,505..8,891,192	+	dally
3L:8,836,462..8,838,843	+	CG32026
3L:8,888,145..8,888,633	-	CG43169
3L:8,891,596..8,894,310	+	Mcm7
3L:8,894,404..8,905,200	-	TrpA1
3L:8,905,918..8,912,186	-	mfr

## Sheet: Locus 4
Locus	4
Chromosome	3R
Range	25,790,000-26,700,000
Protein Coding Genes				miRNAs
Sequence Coordinates	Strand	Gene name		Sequence Coordinates	Strand	Gene name
3R:25,789,819..25,790,471	-	CG31093
3R:25,806,445..25,806,961	+	BG642167
3R:25,811,096..25,811,738	+	CG5024
3R:25,811,911..25,813,134	+	CG17770
3R:25,812,539..25,813,134	+	Acam
3R:25,815,479..25,816,574	+	CG14354
3R:25,829,321..25,829,698	-	Mst57Dc
3R:25,830,061..25,830,228	-	Sfp96F
3R:25,830,720..25,830,914	-	Mst57Db
3R:25,831,575..25,831,899	-	Mst57Da
3R:25,832,230..25,842,878	+	alpha4GT2
3R:25,850,410..25,851,291	-	CG14545
3R:25,851,632..25,853,989	+	CG5886
3R:25,856,154..25,872,670	+	CG5890
3R:25,873,534..25,881,427	-	Tsp96F
3R:25,881,984..25,888,230	+	SppL
3R:25,888,542..25,893,270	+	Lnk
3R:25,893,495..25,895,026	+	CG5913
3R:25,895,822..25,897,174	+	CG5948
3R:25,897,476..25,899,744	+	Mco3
3R:25,899,903..25,902,172	+	CG31091
3R:25,902,643..25,904,178	+	CG31089
3R:25,907,022..25,921,046	+	CG42235
3R:25,921,042..25,922,634	-	CG14546
3R:25,923,499..25,956,270	-	CCAP-R
3R:25,959,279..25,961,686	+	CG14540
3R:25,961,994..25,966,948	+	boss
3R:25,970,080..25,982,736	+	fid
3R:25,983,013..25,993,991	+	Nf1
3R:25,995,879..25,996,996	-	CG43116
3R:25,997,621..25,998,633	+	E(spl)mdelta-HLH
3R:25,999,851..26,000,761	+	E(spl)mgamma-HLH
3R:26,005,046..26,006,023	-	E(spl)mbeta-HLH
3R:26,010,893..26,011,568	+	E(spl)malpha-BFM
3R:26,014,721..26,015,452	+	Kaz-m1
3R:26,016,514..26,017,470	-	E(spl)m2-BFM
3R:26,021,823..26,023,127	+	E(spl)m3-HLH
3R:26,023,821..26,024,579	-	E(spl)m4-BFM
3R:26,028,854..26,029,735	-	E(spl)m5-HLH
3R:26,032,911..26,034,047	+	E(spl)m6-BFM
3R:26,037,038..26,038,019	+	E(spl)m7-HLH
3R:26,040,240..26,041,008	+	E(spl)m8-HLH
3R:26,041,736..26,049,911	+	gro
3R:26,049,731..26,052,257	-	Exo84
3R:26,052,821..26,054,128	+	Vps2
3R:26,054,237..26,055,438	-	Cmpk
3R:26,055,657..26,056,547	-	Sld5
3R:26,056,630..26,057,350	+	CG14543
3R:26,057,347..26,058,223	-	PIG-P
3R:26,057,347..26,058,223	-	CG42498
3R:26,058,420..26,059,267	-	RpL34a
3R:26,059,508..26,061,267	+	CG14544
3R:26,061,268..26,063,011	-	CG14551
3R:26,076,592..26,098,711	-	dysf
3R:26,126,659..26,127,868	+	CG14556
3R:26,128,804..26,130,190	+	CG31324
3R:26,133,154..26,137,148	+	CG6142
3R:26,171,387..26,184,974	+	CG31323
3R:26,185,251..26,186,227	+	CG31086
3R:26,187,018..26,188,807	-	CG6073
3R:26,189,004..26,189,977	-	CG34130
3R:26,190,234..26,191,205	-	CG34129
3R:26,230,248..26,234,700	+	CG12290
3R:26,255,966..26,261,412	-	Ald1
3R:26,268,290..26,275,029	+	CG6154
3R:26,318,355..26,362,588	+	osy
3R:26,344,290..26,345,473	-	CG6036
3R:26,401,909..26,403,656	-	ppk15
3R:26,414,088..26,416,192	+	Ald2
3R:26,424,698..26,425,102	-	CG6503
3R:26,425,290..26,425,781	-	CG34291
3R:26,440,778..26,448,991	+	tx
3R:26,449,079..26,450,585	+	Hex-t1
3R:26,450,671..26,452,327	+	Hex-t2
3R:26,452,534..26,454,585	+	CG5447
3R:26,454,794..26,455,112	+	CG43117
3R:26,455,462..26,456,141	-	Pdf
3R:26,456,877..26,457,242	+	CG14237
3R:26,458,249..26,460,981	+	CG14238
3R:26,461,527..26,470,008	+	CG5455
3R:26,471,103..26,535,217	-	plum
3R:26,536,350..26,604,051	+	scrib
3R:26,619,118..26,620,224	+	TwdlM
3R:26,620,608..26,621,364	-	TwdlP
3R:26,622,451..26,623,543	-	TwdlB
3R:26,624,587..26,625,652	-	TwdlL
3R:26,625,932..26,626,738	-	TwdlO
3R:26,627,885..26,628,724	-	TwdlK
3R:26,629,918..26,630,825	+	TwdlJ
3R:26,631,869..26,632,956	+	TwdlN
3R:26,633,732..26,634,714	+	TwdlH
3R:26,634,885..26,635,998	+	TwdlR
3R:26,636,688..26,637,557	+	TwdlS
3R:26,640,025..26,641,054	+	TwdlD
3R:26,645,282..26,681,966	-	beat-VII
3R:26,656,440..26,657,531	+	Tb
3R:26,692,546..26,693,590	-	TwdlQ
3R:26,697,697..26,714,159	-	amon

## Sheet: Locus 5
Locus	5
Chromosome	3R
Range	27,200,000-28,840,000
Protein Coding Genes				miRNAs
Sequence Coordinates	Strand	Gene name		Sequence Coordinates	Strand	Gene name
3R:27,227,070..27,228,561	-	CG42813		3R:27,642,480..27,642,501	-	mir-1001
3R:27,228,673..27,229,468	-	CG42814
3R:27,229,505..27,238,114	-	CG31064
3R:27,233,698..27,236,360	+	CG31068
3R:27,239,163..27,241,228	+	DNApol-alpha73
3R:27,241,267..27,242,330	+	CG17991
3R:27,242,335..27,244,818	-	CG18766
3R:27,246,403..27,247,992	-	CG5984
3R:27,248,234..27,251,007	-	TTLL6B
3R:27,251,131..27,253,182	-	pll
3R:27,253,430..27,256,463	+	TfIIA-L
3R:27,256,595..27,264,055	-	woc
3R:27,264,374..27,265,430	-	CG14262
3R:27,265,457..27,266,423	+	CG14260
3R:27,266,326..27,273,273	-	l(3)mbt
3R:27,273,705..27,274,565	+	CG5934
3R:27,275,315..27,277,142	+	CG5938
3R:27,277,249..27,280,711	-	mrt
3R:27,283,780..27,287,448	+	CG3368
3R:27,287,366..27,288,526	-	bigmax
3R:27,288,769..27,291,592	+	Hmu
3R:27,291,535..27,292,209	-	CG3348
3R:27,294,286..27,322,325	-	CG3339
3R:27,329,693..27,330,882	-	CG3330
3R:27,340,622..27,371,349	+	CG42534
3R:27,366,658..27,368,717	-	CG46335
3R:27,375,499..27,437,482	-	side
3R:27,438,871..27,440,944	-	CG44290
3R:27,440,312..27,440,845	+	CG43447
3R:27,464,189..27,467,080	+	CG13978
3R:27,478,675..27,482,904	+	Cyp6a18
3R:27,487,927..27,489,968	+	Gr98a
3R:27,501,366..27,502,025	-	CG43139
3R:27,502,090..27,502,956	-	CG5402
3R:27,515,911..27,517,257	-	CG13972
3R:27,520,866..27,533,934	+	CG12885
3R:27,542,497..27,543,888	+	Gr98b
3R:27,544,443..27,545,836	+	Gr98c
3R:27,546,052..27,547,462	+	Gr98d
3R:27,547,775..27,559,145	-	Klp98A
3R:27,559,379..27,561,319	-	CG5646
3R:27,561,675..27,581,543	-	wdb
3R:27,582,840..27,586,376	+	pins
3R:27,586,474..27,596,130	-	CG5639
3R:27,597,761..27,607,396	-	dsd
3R:27,608,245..27,634,932	+	Tusp
3R:27,623,359..27,626,011	-	CG5612
3R:27,634,625..27,636,060	-	CG5611
3R:27,636,549..27,639,871	+	Mtl
3R:27,639,886..27,656,814	-	tau
3R:27,652,760..27,653,363	+	RpS10a
3R:27,657,563..27,660,177	-	Mlc1
3R:27,662,439..27,677,099	+	unc80
3R:27,677,522..27,679,013	+	CG5590
3R:27,679,291..27,680,336	+	CG12883
3R:27,680,431..27,682,029	-	Sce
3R:27,685,632..27,688,134	-	CG31055
3R:27,685,962..27,692,790	+	CG12880
3R:27,694,318..27,694,541	+	CG43319
3R:27,694,883..27,695,057	+	Acp98AB
3R:27,695,235..27,696,531	+	HSPBAP1
3R:27,696,466..27,700,110	-	ALiX
3R:27,700,361..27,703,178	+	btz
3R:27,703,379..27,706,328	-	CROT
3R:27,707,100..27,710,857	+	CG12877
3R:27,743,180..27,747,817	+	Ets98B
3R:27,769,520..27,905,843	-	CG34353
3R:27,845,950..27,847,260	+	Or98a
3R:27,871,501..27,872,390	-	CG12426
3R:27,912,447..27,913,785	+	mil
3R:27,913,777..27,916,516	-	CG5003
3R:27,916,908..27,918,248	+	mRpS22
3R:27,918,182..27,919,460	-	CG33213
3R:27,919,844..27,921,089	-	CG12259
3R:27,921,283..27,922,356	-	BCAS2
3R:27,922,821..27,924,888	+	RpL4
3R:27,927,357..27,928,174	-	nenya
3R:27,929,625..27,932,868	+	mino
3R:27,932,982..27,937,853	-	NSD
3R:27,938,562..27,942,778	+	BOD1
3R:27,942,796..27,948,021	-	mfrn
3R:27,948,711..27,952,151	+	Gp93
3R:27,952,702..27,954,112	-	CG4951
3R:27,954,917..27,957,326	+	Nep7
3R:27,957,356..27,959,245	-	CG4884
3R:27,957,356..27,959,245	-	CG42487
3R:27,959,346..27,960,573	-	CG31253
3R:27,961,992..27,963,219	-	CG31131
3R:27,963,415..27,966,958	+	CG4849
3R:27,967,008..27,988,384	-	betaTub97EF
3R:27,989,699..27,990,751	-	CG4815
3R:28,026,615..28,085,762	+	trv
3R:28,146,880..28,240,526	+	CG34354
3R:28,262,735..28,263,622	-	CG43125
3R:28,263,871..28,264,773	-	CG43124
3R:28,282,580..28,283,548	+	CG34436
3R:28,283,719..28,284,725	+	CG34437
3R:28,291,338..28,292,656	+	Mst98Ca
3R:28,292,798..28,293,863	+	Mst98Cb
3R:28,294,048..28,294,550	+	UQCR-14L
3R:28,303,631..28,304,605	-	CG12516
3R:28,318,162..28,328,283	-	larp
3R:28,337,019..28,339,765	-	Gfat2
3R:28,340,334..28,345,169	+	Moca-cyp
3R:28,352,242..28,353,620	+	Or98b
3R:28,418,208..28,474,814	+	beat-VI
3R:28,484,557..28,486,062	+	CG1894
3R:28,486,953..28,519,398	+	Dhc98D
3R:28,519,548..28,520,515	-	CG31051
3R:28,520,665..28,540,324	-	Ppn
3R:28,542,274..28,544,817	-	mIF2
3R:28,581,083..28,585,112	-	fkh
3R:28,598,059..28,599,288	-	Noa36
3R:28,599,834..28,605,095	+	Hrb98DE
3R:28,606,079..28,608,372	+	CG9986
3R:28,607,939..28,635,099	-	CG10011
3R:28,636,411..28,638,799	+	CG9988
3R:28,641,585..28,642,891	-	CG14062
3R:28,649,909..28,650,480	-	CG31050
3R:28,669,233..28,670,452	+	CG33346
3R:28,670,704..28,672,021	+	Sid
3R:28,682,100..28,695,939	+	snu
3R:28,696,242..28,734,816	+	htt
3R:28,737,388..28,744,782	-	AstA-R2
3R:28,748,384..28,751,661	-	CG10000
3R:28,755,484..28,756,979	-	CG9997
3R:28,756,999..28,758,234	-	aqrs
3R:28,789,617..28,790,483	+	CG34295
3R:28,790,522..28,791,461	+	intr
3R:28,806,702..28,807,501	+	CheB98a
3R:28,807,983..28,811,337	-	wdn
3R:28,812,102..28,817,354	+	CG1646
3R:28,817,342..28,819,668	-	CG1523
3R:28,820,221..28,824,508	+	CG1647
3R:28,824,506..28,827,373	-	WASp
3R:28,832,301..28,844,748	-	Apc

## Sheet: Locus 6
Locus	6
Chromosome	3R
Range	30,000,000-30,990,000
Protein Coding Genes				miRNAs
Sequence Coordinates	Strand	Gene name		Sequence Coordinates	Strand	Gene name
3R:29,999,795..30,000,403	+	CG34298		3R:30,506,866..30,506,887	+	mir-4908
3R:30,000,530..30,003,678	+	Tace		3R:30,791,639..30,791,658	-	mir-1013
3R:30,003,681..30,004,699	-	Nph
3R:30,004,785..30,010,352	+	Nlp
3R:30,006,034..30,009,189	-	CG7912
3R:30,010,476..30,015,284	-	CG7920
3R:30,015,513..30,022,221	-	Mgat2
3R:30,022,345..30,022,648	-	RpS28a
3R:30,022,842..30,035,311	+	Axn
3R:30,035,240..30,036,870	-	ZIPIC
3R:30,037,003..30,037,730	-	ocn
3R:30,037,984..30,038,728	-	janB
3R:30,038,622..30,039,516	-	janA
3R:30,039,719..30,041,031	+	Sry-beta
3R:30,041,217..30,043,071	+	Sry-alpha
3R:30,043,341..30,044,886	+	Sry-delta
3R:30,045,229..30,046,068	-	RpL32
3R:30,046,470..30,048,665	+	CG7943
3R:30,048,635..30,052,112	-	CG15528
3R:30,052,514..30,054,697	+	Jasper
3R:30,054,696..30,056,037	-	spn-A
3R:30,055,957..30,056,603	+	Rpp14b
3R:30,056,859..30,058,131	+	CG7950
3R:30,056,859..30,058,131	+	Rpp14a
3R:30,058,311..30,121,798	+	sima
3R:30,122,023..30,123,263	-	CG45072
3R:30,123,801..30,124,735	-	CG45073
3R:30,125,633..30,129,119	-	Ppi1
3R:30,129,279..30,132,395	-	CG31029
3R:30,132,981..30,134,309	-	Tpi
3R:30,134,856..30,149,606	-	AdoR
3R:30,152,059..30,153,699	+	CG15529
3R:30,153,022..30,160,473	-	CG11498
3R:30,164,692..30,166,419	-	CG31030
3R:30,166,631..30,171,207	-	CG31028
3R:30,171,438..30,174,551	-	Mlc2
3R:30,176,231..30,177,700	-	CG1983
3R:30,177,877..30,180,178	+	CG15530
3R:30,180,232..30,181,486	+	Bet5
3R:30,185,423..30,191,072	-	CG9747
3R:30,194,790..30,196,228	-	CG15531
3R:30,196,360..30,202,998	-	CG9743
3R:30,206,447..30,208,694	-	RpS7
3R:30,209,948..30,210,382	+	Anp
3R:30,210,874..30,211,273	+	CecA1
3R:30,212,156..30,212,568	+	CecA2
3R:30,213,315..30,213,797	-	CecB
3R:30,216,484..30,216,938	+	CecC
3R:30,237,094..30,237,734	-	CG43448
3R:30,241,268..30,243,312	-	CG9737
3R:30,243,978..30,246,703	-	CG9733
3R:30,249,583..30,250,661	+	CG34299
3R:30,251,089..30,252,830	+	CG9682
3R:30,253,182..30,254,097	+	CG18404
3R:30,277,932..30,362,093	+	hdc
3R:30,305,808..30,306,640	-	CG34300
3R:30,385,573..30,387,860	-	Fer1HCH
3R:30,388,830..30,390,584	+	Fer2LCH
3R:30,418,767..30,422,971	-	CG42740
3R:30,418,767..30,422,971	-	CG2217
3R:30,423,032..30,423,929	-	CG15535
3R:30,423,974..30,424,556	+	mRpS18C
3R:30,424,499..30,425,162	-	CG15536
3R:30,425,427..30,428,276	-	CG2218
3R:30,428,820..30,431,362	+	CG15533
3R:30,432,064..30,435,139	+	CG15534
3R:30,435,177..30,443,599	-	CG15537
3R:30,444,076..30,445,046	-	Osi23
3R:30,445,635..30,450,406	-	aralar1
3R:30,456,441..30,459,300	-	CG2224
3R:30,460,467..30,465,736	+	CDase
3R:30,466,050..30,485,799	+	PH4alphaEFB
3R:30,476,684..30,478,849	+	spdo
3R:30,487,016..30,487,928	-	Jon99Fii
3R:30,488,963..30,489,895	+	Jon99Fi
3R:30,490,074..30,491,987	+	PH4alphaSG2
3R:30,491,813..30,496,153	-	PH4alphaMP
3R:30,496,751..30,500,326	-	PH4alphaNE1
3R:30,501,124..30,503,506	-	CG31371
3R:30,503,665..30,505,661	-	PH4alphaSG1
3R:30,505,987..30,507,977	+	CG15539
3R:30,508,023..30,510,146	+	CG34041
3R:30,510,083..30,512,214	-	PH4alphaNE2
3R:30,512,325..30,514,355	-	CG31524
3R:30,514,777..30,516,980	+	CG9698
3R:30,517,059..30,527,037	-	jdp
3R:30,532,607..30,578,905	+	tmod
3R:30,554,554..30,560,199	-	CG34155
3R:30,579,636..30,582,117	+	CG9702
3R:30,582,198..30,583,697	-	Rpt6R
3R:30,584,020..30,587,302	-	CG9717
3R:30,592,971..30,600,323	-	CG2246
3R:30,597,004..30,599,296	+	CG31019
3R:30,602,206..30,604,041	+	CG31021
3R:30,604,181..30,606,144	+	PH4alphaNE3
3R:30,606,189..30,610,456	+	CG31016
3R:30,618,626..30,621,906	-	CG44954
3R:30,627,241..30,629,028	-	CG2267
3R:30,643,767..30,645,880	-	CG31013
3R:30,646,106..30,648,551	-	PH4alphaPV
3R:30,649,151..30,649,873	+	CG34432
3R:30,649,961..30,650,858	+	CG34433
3R:30,690,642..30,692,768	+	Spn100A
3R:30,693,572..30,695,498	-	CG12069
3R:30,695,537..30,697,138	-	Pka-C2
3R:30,704,762..30,706,121	-	CG31010
3R:30,726,087..30,728,052	+	eIF4H2
3R:30,729,837..30,731,165	-	CG11313
3R:30,742,880..30,743,915	+	CG15543
3R:30,744,672..30,745,263	-	Npc2g
3R:30,745,479..30,746,290	-	Npc2h
3R:30,783,258..30,787,177	+	zfh1
3R:30,789,625..30,806,619	-	wts
3R:30,807,117..30,807,978	+	dj-1beta
3R:30,817,614..30,826,550	+	cindr
3R:30,827,819..30,842,034	+	CG15544
3R:30,852,315..30,854,400	+	tll
3R:30,867,521..30,869,184	+	Cpr100A
3R:30,870,939..30,872,351	-	CG15545
3R:30,874,365..30,876,186	-	CG15546
3R:30,877,569..30,881,027	-	CG12071
3R:30,881,792..30,883,503	-	CG15547
3R:30,883,464..30,889,062	-	Sap-r
3R:30,894,038..30,900,688	+	Cyp4c3
3R:30,900,718..30,901,435	-	CG33483
3R:30,912,754..30,930,151	+	Ptx1
3R:30,935,396..30,936,507	-	CG15549
3R:30,936,589..30,937,102	-	CG15550
3R:30,959,700..30,962,307	+	CG15548
3R:30,963,290..30,964,320	-	Ctr1C
3R:30,968,236..31,016,875	-	5-HT7
3R:30,989,478..30,990,006	-	CG31008

## Sheet: Locus 7
Locus	7
Chromosome	X
Range	15,140,000-16,270,000
Protein Coding Genes				miRNAs
Sequence Coordinates	Strand	Gene name		Sequence Coordinates	Strand	Gene name
X:15,228,744..15,229,875	-	CG9101		X:15,319,971..15,319,991	-	mir-4957
X:15,139,937..15,163,225	-	CG9095		X:15,507,976..15,507,997	+	mir-283
X:15,175,441..15,189,931	+	CG43737		X:15,509,016..15,509,037	+	mir-304
X:15,205,807..15,206,636	-	CG32588		X:15,509,479..15,509,501	+	mir-12
X:15,210,386..15,211,467	+	CG5662		X:15,965,962..15,965,983	-	mir-927
X:15,220,271..15,221,176	-	CG43075		X:16,081,004..16,081,025	-	mir-4958
X:15,222,657..15,223,582	-	CG43076		X:16,191,303..16,191,324	-	mir-985
X:15,243,859..15,244,913	-	PPYR1
X:15,271,036..15,272,405	-	CG9106
X:15,293,031..15,296,644	+	CG5877
X:15,299,009..15,319,074	+	gce
X:15,322,846..15,326,530	+	Top1
X:15,328,342..15,331,002	+	dah
X:15,330,784..15,333,154	-	CG9114
X:15,335,141..15,340,360	+	HDAC6
X:15,340,373..15,342,117	-	CG9123
X:15,342,857..15,344,625	-	CG12608
X:15,345,169..15,350,021	+	CG6227
X:15,350,239..15,379,064	-	acj6
X:15,359,101..15,361,061	-	Pp1-13C
X:15,380,639..15,383,953	-	CG9164
X:15,386,038..15,440,725	-	Cngl
X:15,446,179..15,449,883	-	Scamp
X:15,450,261..15,453,167	+	Ahcy
X:15,453,471..15,455,551	+	CG11655
X:15,455,544..15,462,441	-	shtd
X:15,462,722..15,465,027	+	CG6294
X:15,465,565..15,466,812	+	CG6299
X:15,466,184..15,467,757	-	CG15642
X:15,467,891..15,468,303	+	CG15641
X:15,468,281..15,472,119	-	Grip128
X:15,472,164..15,472,859	+	Alg14
X:15,472,804..15,475,400	-	mh
X:15,476,091..15,481,722	+	CG6324
X:15,482,374..15,486,612	+	CG6340
X:15,489,881..15,511,223	+	Gmap
X:15,511,458..15,522,163	-	Ac13E
X:15,555,253..15,556,045	-	CG42300
X:15,569,166..15,570,369	+	CG7860
X:15,570,380..15,572,149	-	CG15643
X:15,572,076..15,574,535	-	CG9213
X:15,574,947..15,575,683	-	CG42299
X:15,576,986..15,577,998	-	cerv
X:15,578,205..15,579,857	+	CG7872
X:15,580,930..15,582,874	-	CG9215
X:15,583,159..15,585,018	+	CG8097
X:15,585,289..15,593,151	-	Chsy
X:15,587,733..15,589,365	+	Alp11
X:15,604,576..15,633,434	-	sog
X:15,644,222..15,644,991	+	CG8117
X:15,662,585..15,663,319	+	CG8119
X:15,667,885..15,669,797	-	CG15646
X:15,675,476..15,677,737	+	CG12708
X:15,684,947..15,688,857	-	CG15599
X:15,697,494..15,700,034	+	CG8128
X:15,700,172..15,701,259	-	CG9240
X:15,701,451..15,703,770	-	Pis
X:15,704,125..15,705,731	+	CG8134
X:15,705,806..15,710,539	-	CG9281
X:15,710,647..15,712,186	+	CG15601
X:15,712,628..15,731,935	+	HUWE1
X:15,732,178..15,733,663	+	CG8191
X:15,733,222..15,733,996	-	CG12379
X:15,734,270..15,735,780	+	MagR
X:15,735,774..15,737,120	-	Arp6
X:15,737,493..15,738,954	-	CG11679
X:15,739,230..15,740,242	+	CG8206
X:15,741,343..15,746,231	-	CG8944
X:15,746,648..15,748,971	+	CCT6
X:15,749,166..15,751,737	+	Mvd
X:15,751,674..15,760,649	-	Graf
X:15,756,318..15,757,767	+	CG8260
X:15,761,248..15,762,663	+	mRpL3
X:15,762,956..15,769,514	+	RpIIIC160
X:15,765,470..15,766,445	-	CG8952
X:15,769,664..15,772,985	+	CG33172
X:15,772,963..15,778,774	+	CG43672
X:15,779,146..15,780,214	+	CG43673
X:15,780,398..15,783,710	-	Efhc1.1
X:15,784,009..15,785,583	-	Paf-AHalpha
X:15,786,047..15,788,288	+	mRpS30
X:15,788,897..15,793,632	+	Rhp
X:15,793,721..15,796,028	-	CG8974
X:15,796,908..15,799,162	-	CG32581
X:15,799,596..15,800,961	+	CG15602
X:15,801,153..15,803,880	-	PGRP-LE
X:15,809,555..15,810,947	+	CG8509
X:15,812,327..15,825,722	+	sd
X:15,827,986..15,835,490	-	Chc
X:15,837,830..15,841,160	+	CG8565
X:15,841,769..15,844,145	-	ArgRS
X:15,844,476..15,847,626	+	CG8578
X:15,847,859..15,849,258	-	sun
X:15,850,315..15,853,175	-	UBL3
X:15,853,421..15,854,970	+	CG15914
X:15,854,832..15,857,823	-	Myb
X:15,854,857..15,857,823	-	CG46440
X:15,858,134..15,859,379	-	AlkB
X:15,860,115..15,866,175	+	Gbeta13F
X:15,868,145..15,869,661	+	Gapdh2
X:15,870,183..15,875,530	+	CG16952
X:15,876,368..15,887,311	-	tay
X:15,887,567..15,890,109	-	MSBP
X:15,890,589..15,891,547	+	CG15916
X:15,892,116..15,906,252	+	shi
X:15,906,822..15,909,676	-	CycD
X:15,910,870..15,920,570	+	Lrp4
X:15,921,955..15,924,558	+	CG8916
X:15,925,105..15,928,529	+	Lcch3
X:15,927,185..15,933,675	-	Ranbp16
X:15,937,910..15,940,451	-	Stim
X:15,941,077..15,944,449	+	CG8924
X:15,944,978..15,945,887	+	Rrp47
X:15,946,936..15,973,067	-	mmd
X:15,974,425..15,976,706	+	Or13a
X:15,976,868..15,977,660	+	CG42766
X:15,977,967..15,982,944	-	CG9170
X:15,983,772..15,985,405	+	Slc25A46a
X:15,985,849..15,986,745	-	ND-20
X:15,987,166..15,991,974	-	CG46312
X:15,987,166..15,991,974	-	eIF5
X:15,992,936..15,996,509	+	exd
X:15,997,016..15,999,698	+	CG8939
X:16,000,228..16,005,812	-	vap
X:16,006,147..16,008,721	+	CG12698
X:16,009,114..16,061,722	+	Muc14A
X:16,061,902..16,062,898	-	CG12395
X:16,063,738..16,070,304	+	dpr18
X:16,070,365..16,073,282	-	Nipsnap
X:16,077,887..16,087,389	-	Tob
X:16,083,232..16,085,751	+	CG8958
X:16,093,059..16,096,663	-	CG42354
X:16,093,059..16,104,946	-	CG42353
X:16,118,067..16,148,977	-	disco-r
X:16,210,774..16,216,746	-	disco
X:16,265,242..16,266,537	-	CG12507
X:16,267,007..16,275,917	-	kat80

## Sheet: Locus 8
Locus	8
Chromosome	X
Range	17,680,000-21,170,000
Protein Coding Genes				miRNAs
Sequence Coordinates	Strand	Gene name		Sequence Coordinates	Strand	Gene name
X:17,672,458..17,698,730	-	chas		X:18,124,375..18,124,395	+	mir-969
X:17,698,917..17,702,777	-	CG8188		X:18,128,270..18,128,292	+	mir-210
X:17,703,352..17,707,096	+	par-6		X:19,169,201..19,169,222	-	mir-4959
X:17,707,401..17,709,653	-	CG8173		X:19,551,171..19,551,191	+	mir-972
X:17,710,144..17,751,685	+	raskol		X:19,551,357..19,551,376	+	mir-9369
X:17,768,569..17,778,579	+	unc-4		X:19,551,546..19,551,570	+	mir-973
X:17,791,010..17,814,011	+	OdsH		X:19,551,702..19,551,723	+	mir-974
X:17,819,155..17,819,685	-	CG12986		X:19,557,067..19,557,090	+	mir-2499
X:17,820,764..17,827,564	-	Socs16D		X:19,558,430..19,558,451	+	mir-4966-1
X:17,830,828..17,841,593	+	CG6398		X:19,558,631..19,558,652	+	mir-4966-2
X:17,842,161..17,843,348	+	e(y)1		X:19,558,807..19,558,828	+	mir-975
X:17,843,343..17,844,704	-	CG8142		X:19,558,917..19,558,938	+	mir-976
X:17,844,949..17,847,944	+	Ucp4A		X:19,559,046..19,559,067	+	mir-977
X:17,848,110..17,850,342	-	CG15814		X:19,561,251..19,561,274	+	mir-978
X:17,850,460..17,851,889	+	Spt7		X:19,561,859..19,561,881	+	mir-979
X:17,851,869..17,852,685	-	CG32554
X:17,852,958..17,856,129	-	Mco4
X:17,857,112..17,858,433	+	CG6762
X:17,858,379..17,860,800	-	Arp8
X:17,861,002..17,862,700	+	CG6769
X:17,867,568..17,887,222	-	mnb
X:17,883,718..17,885,238	+	CG12985
X:17,888,177..17,889,404	+	CG6788
X:17,889,547..17,898,603	+	Gss1
X:17,899,981..17,903,059	+	Gss2
X:17,906,031..17,907,261	-	CG7772
X:17,907,692..17,911,097	+	Vps4
X:17,911,462..17,924,163	+	CG6847
X:17,949,980..18,015,235	-	Sh
X:18,005,897..18,007,606	-	CG12672
X:18,023,870..18,028,261	+	CG6867
X:18,043,991..18,048,720	+	CG15373
X:18,064,483..18,078,472	+	Dhc16F
X:18,078,863..18,085,407	-	CG7536
X:18,085,761..18,088,418	+	Ada3
X:18,088,725..18,090,509	-	CG7206
X:18,091,259..18,092,853	+	scu
X:18,094,590..18,097,413	+	RhoGAP16F
X:18,097,558..18,100,261	-	Mvb12
X:18,101,970..18,103,482	+	Taf8
X:18,103,653..18,105,393	+	CG7135
X:18,105,568..18,116,922	-	wupA
X:18,129,585..18,130,178	-	CG43133
X:18,131,669..18,137,784	-	ari-1
X:18,138,542..18,139,000	+	CG43229
X:18,155,369..18,174,744	+	Frq1
X:18,177,612..18,204,407	+	Frq2
X:18,178,526..18,179,472	-	Andorra
X:18,204,403..18,205,144	-	Hesr
X:18,209,427..18,210,741	+	Him
X:18,210,812..18,226,076	-	CG33639
X:18,240,654..18,243,284	-	upd2
X:18,258,614..18,259,517	-	CG15059
X:18,277,233..18,284,596	+	upd3
X:18,305,354..18,309,129	-	upd1
X:18,314,124..18,315,901	-	CG6023
X:18,322,958..18,356,191	-	CG6123
X:18,358,881..18,362,527	+	CG6106
X:18,371,261..18,376,817	+	CrebB
X:18,378,004..18,379,851	-	por
X:18,380,082..18,381,479	+	CG6179
X:18,381,549..18,385,242	-	betaCOP
X:18,387,921..18,390,344	+	Tsf1
X:18,390,556..18,410,144	-	CG32549
X:18,399,569..18,400,065	-	CG34328
X:18,415,415..18,416,911	+	CG15056
X:18,422,413..18,427,001	+	CG42323
X:18,435,719..18,437,300	-	CG32548
X:18,437,490..18,438,233	+	CG6290
X:18,438,868..18,439,260	+	CG32551
X:18,439,667..18,440,076	+	CG43841
X:18,443,027..18,479,487	-	CG32547
X:18,459,138..18,460,418	-	CG43843
X:18,480,101..18,483,772	-	Hayan
X:18,484,487..18,486,921	-	psh
X:18,487,450..18,489,620	-	CG15046
X:18,491,185..18,492,006	-	CG15044
X:18,493,402..18,494,168	-	CG15043
X:18,495,067..18,499,986	-	Pgant7
X:18,500,127..18,501,258	+	Xrcc2
X:18,501,401..18,505,405	-	Wnt5
X:18,505,883..18,512,337	-	Ggt-1
X:18,512,829..18,514,867	-	CG6470
X:18,515,428..18,520,445	+	HisRS
X:18,515,428..18,571,726	+	Bx
X:18,521,074..18,522,445	-	CG6481
X:18,526,862..18,528,266	-	CG15042
X:18,528,683..18,529,593	+	CG15047
X:18,606,610..18,617,589	-	CG15040
X:18,624,042..18,634,908	-	wgn
X:18,635,642..18,647,567	-	Rip11
X:18,648,182..18,649,489	+	Nup35
X:18,649,396..18,650,444	-	CG6617
X:18,650,718..18,653,091	-	Ing3
X:18,653,392..18,657,234	-	CG6659
X:18,657,755..18,661,204	+	fu
X:18,660,472..18,662,153	-	CG6696
X:18,685,766..18,688,227	+	phm
X:18,688,538..18,693,042	-	Cyp18a1
X:18,707,494..18,726,572	-	CCKLR-17D1
X:18,709,865..18,711,638	+	Cyp308a1
X:18,724,914..18,725,672	-	CG42302
X:18,739,216..18,739,895	-	CG6873
X:18,746,367..18,748,306	-	CG12609
X:18,764,483..18,774,027	-	CCKLR-17D3
X:18,776,498..18,781,345	+	CG6891
X:18,781,265..18,783,494	-	CG18259
X:18,786,142..18,788,210	-	CG6961
X:18,790,162..18,806,057	+	S6KL
X:18,791,668..18,793,517	+	Atg101
X:18,794,520..18,796,580	-	bnb
X:18,806,694..18,812,002	+	CG7058
X:18,813,297..18,826,703	+	CG42450
X:18,830,591..18,832,123	+	CG7101
X:18,832,682..18,842,901	+	Pvf1
X:18,843,663..18,855,858	+	htk
X:18,846,389..18,848,566	-	shop
X:18,855,940..18,857,757	-	CG7322
X:18,858,203..18,860,072	+	Usp39
X:18,860,284..18,861,964	+	CG32544
X:18,861,560..18,863,776	-	CG7326
X:18,863,950..18,884,075	+	CG34401
X:18,884,513..18,888,860	+	CG7332
X:18,888,978..18,893,636	-	Flacc
X:18,894,507..18,896,581	+	SdhBL
X:18,900,410..18,910,058	+	CG7378
X:18,930,335..19,026,872	+	CG43759
X:19,050,442..19,053,160	+	Diedel3
X:19,056,911..19,067,792	+	CG14190
X:19,068,275..19,068,973	-	CG34330
X:19,077,720..19,078,592	+	CG7406
X:19,081,665..19,082,566	+	CG14191
X:19,082,609..19,083,290	-	CG7423
X:19,123,755..19,124,388	-	CG15882
X:19,125,003..19,127,316	-	tgy
X:19,135,081..19,135,868	-	Obp18a
X:19,143,453..19,165,347	-	RhoGAP18B
X:19,168,777..19,170,883	-	Inx5
X:19,171,077..19,174,900	-	CG33939
X:19,176,997..19,179,830	-	CG7556
X:19,180,173..19,182,024	+	CG7453
X:19,183,421..19,187,278	+	CG33253
X:19,188,035..19,190,193	+	Mec2
X:19,190,214..19,191,029	+	HP1D3csd
X:19,192,219..19,193,448	-	CG7914
X:19,193,555..19,196,037	+	CG14194
X:19,196,058..19,201,780	-	CG7990
X:19,202,103..19,208,187	-	Ulp1
X:19,208,694..19,211,509	-	CG14195
X:19,213,254..19,214,938	+	Mur18B
X:19,215,515..19,216,660	+	Muc18B
X:19,220,622..19,235,910	+	CG7884
X:19,236,059..19,241,840	-	CG14196
X:19,243,631..19,245,224	+	CG7889
X:19,245,158..19,247,250	-	CG7992
X:19,248,639..19,252,045	+	Hs3st-B
X:19,252,111..19,261,240	-	rictor
X:19,261,820..19,272,089	+	Vav
X:19,266,656..19,268,896	-	CG8010
X:19,273,349..19,275,165	-	CG32537
X:19,275,004..19,276,898	-	CG32536
X:19,277,260..19,280,349	-	CG8028
X:19,282,520..19,284,801	-	CG8034
X:19,301,330..19,307,925	-	CG8051
X:19,310,513..19,322,106	-	out
X:19,328,554..19,348,447	-	nAChRalpha7
X:19,353,181..19,470,041	+	kek5
X:19,474,156..19,479,411	-	CG32533
X:19,475,063..19,476,055	+	narya
X:19,479,382..19,480,238	-	mRpS14
X:19,479,984..19,484,643	+	Naa15-16
X:19,485,880..19,492,011	-	pcm
X:19,492,421..19,493,337	+	ND-18
X:19,493,292..19,494,401	-	CG12204
X:19,494,420..19,494,992	-	ksh
X:19,496,675..19,509,350	+	Pfrx
X:19,509,768..19,518,402	+	CG14200
X:19,519,131..19,521,810	-	Idh3a
X:19,521,929..19,525,841	+	CoRest
X:19,531,032..19,531,742	-	CG12231
X:19,532,012..19,547,482	-	CG32532
X:19,561,340..19,565,598	-	Grip84
X:19,566,183..19,569,401	+	car
X:19,571,169..19,579,800	-	Tao
X:19,580,350..19,581,981	-	CG14218
X:19,583,617..19,587,057	+	CG14204
X:19,587,348..19,590,170	-	CG14219
X:19,592,609..19,595,548	+	CG14205
X:19,598,031..19,599,075	+	RpS10b
X:19,599,803..19,601,851	-	CG14220
X:19,605,199..19,611,273	+	CG14207
X:19,611,526..19,615,596	+	Tyler
X:19,611,526..19,615,596	+	Shawn
X:19,616,196..19,616,825	+	CG14210
X:19,616,831..19,618,537	-	Pstk
X:19,616,831..19,618,537	-	Tim9b
X:19,618,819..19,621,118	-	CG14221
X:19,621,451..19,623,074	-	Naa20A
X:19,623,127..19,625,199	+	MKP-4
X:19,625,705..19,626,601	+	CG14212
X:19,627,967..19,638,369	-	e(y)3
X:19,638,889..19,640,746	+	Rcd-1
X:19,641,191..19,642,869	-	CG12237
X:19,643,327..19,644,395	+	Sec61gamma
X:19,644,531..19,646,176	-	Arp10
X:19,646,306..19,652,269	-	Ranbp21
X:19,652,305..19,659,407	+	Elys
X:19,659,442..19,663,367	-	CG14223
X:19,664,561..19,666,048	+	Ssu72
X:19,667,252..19,672,353	+	Zw
X:19,672,312..19,675,891	-	et
X:19,676,061..19,683,518	-	dome
X:19,683,808..19,687,658	+	Ubqn
X:19,687,791..19,688,948	-	CG14227
X:19,689,697..19,693,500	-	Mer
X:19,693,977..19,695,058	-	CG14229
X:19,697,091..19,699,938	+	Cdc42
X:19,699,820..19,701,755	-	CG14231
X:19,701,927..19,704,153	-	CG14232
X:19,704,176..19,706,417	+	CG14230
X:19,706,418..19,713,045	-	meso18E
X:19,718,923..19,730,199	+	CG12531
X:19,731,004..19,734,581	+	AP-1-2beta
X:19,735,570..19,740,456	+	CG14234
X:19,740,537..19,744,335	-	COX6B
X:19,741,224..19,743,068	-	CG18809
X:19,744,431..19,745,747	+	CG33932
X:19,744,431..19,745,898	+	Rpp20
X:19,746,080..19,748,458	+	parvin
X:19,748,923..19,750,167	+	Alr
X:19,754,871..19,759,280	+	Pmp70
X:19,759,173..19,762,318	-	CG12702
X:19,775,987..19,783,143	-	zld
X:19,812,729..19,813,384	+	SkpD
X:19,816,072..19,816,700	+	SkpC
X:19,823,368..19,824,080	-	SkpE
X:19,831,607..19,852,059	-	pico
X:19,852,214..19,859,379	+	Nup205
X:19,859,743..19,865,524	-	THADA
X:19,866,146..19,908,108	+	Hers
X:19,886,108..19,890,060	-	amn
X:19,909,318..19,910,117	-	CG45486
X:19,914,482..19,915,281	-	CG45487
X:19,919,641..19,920,435	-	CG45488
X:19,928,416..19,929,178	-	CG45489
X:19,933,541..19,934,294	-	CG45490
X:19,938,232..19,938,994	-	CG45491
X:19,943,357..19,944,147	-	CG45492
X:19,948,079..19,948,873	-	CG45493
X:19,952,814..19,953,608	-	CG45494
X:19,957,548..19,958,342	-	CG43784
X:19,958,393..19,959,403	-	CG12655
X:19,961,297..19,969,323	+	Nep3
X:20,000,968..20,002,096	-	CG17003
X:20,004,680..20,062,706	-	Dop2R
X:20,051,294..20,052,519	+	CG9570
X:20,091,428..20,092,408	-	fd19B
X:20,094,398..20,095,767	+	Or19b
X:20,096,162..20,096,474	-	CG42581
X:20,110,110..20,110,575	-	karr
X:20,122,453..20,125,271	+	CG34331
X:20,133,579..20,138,878	+	CG15322
X:20,139,793..20,140,170	+	CG42583
X:20,141,010..20,141,476	+	CG34332
X:20,141,819..20,143,188	-	Or19a
X:20,148,124..20,155,514	+	CG9572
X:20,155,766..20,159,872	-	Rab35
X:20,160,644..20,165,830	-	Phf7
X:20,166,673..20,168,080	+	CG9577
X:20,168,042..20,169,981	-	CG9581
X:20,170,222..20,171,526	+	CG9578
X:20,171,445..20,173,514	-	AnxB10
X:20,174,217..20,178,638	-	Sdic1
X:20,181,590..20,186,487	-	Sdic2
X:20,189,601..20,194,227	-	Sdic3
X:20,197,319..20,201,933	-	SdicA
X:20,205,043..20,209,603	-	SdicB
X:20,212,738..20,217,259	-	SdicC
X:20,220,666..20,225,020	-	Sdic4
X:20,227,961..20,236,198	-	sw
X:20,239,855..20,243,209	+	obst-A
X:20,244,647..20,248,203	+	Peritrophin-A
X:20,248,309..20,251,093	-	CG17068
X:20,251,338..20,254,691	+	Rab10
X:20,254,692..20,257,131	-	CG17065
X:20,259,239..20,259,656	+	CG42577
X:20,267,821..20,269,769	-	Inx6
X:20,302,015..20,330,372	-	CG1504
X:20,327,444..20,328,680	+	CG1631
X:20,375,764..20,376,522	-	CG12679
X:20,390,096..20,390,806	-	jb
X:20,391,447..20,392,401	+	l(1)G0004
X:20,392,334..20,393,751	-	Syx16
X:20,394,395..20,412,247	+	HERC2
X:20,412,341..20,413,581	-	CG15459
X:20,413,652..20,414,199	-	CG15458
X:20,415,744..20,416,521	+	Obp19a
X:20,416,733..20,417,812	+	Obp19b
X:20,417,921..20,418,964	-	Obp19c
X:20,419,613..20,420,979	+	Obp19d
X:20,421,087..20,423,796	-	Pp4-19C
X:20,424,069..20,426,402	+	cactin
X:20,426,509..20,427,042	-	CG15456
X:20,427,535..20,429,673	-	CG11710
X:20,430,135..20,433,210	+	mal
X:20,433,950..20,445,599	+	CG1695
X:20,446,371..20,446,703	+	CG42578
X:20,449,331..20,467,065	+	tbc
X:20,468,385..20,469,796	+	GstT3
X:20,469,955..20,510,694	-	RhoGAP19D
X:20,486,180..20,486,588	+	CG15461
X:20,511,544..20,515,828	+	CG1812
X:20,515,908..20,524,928	-	Tak1
X:20,527,631..20,528,043	+	CG42579
X:20,538,497..20,567,097	+	RunxB
X:20,574,282..20,574,693	+	CG42580
X:20,590,252..20,623,773	-	RunxA
X:20,657,122..20,661,425	+	Cyp6v1
X:20,668,328..20,669,669	+	CG1835
X:20,670,832..20,675,241	-	hydra
X:20,690,670..20,697,321	+	run
X:20,734,744..20,735,960	-	CG1324
X:20,744,965..20,745,965	-	CG15452
X:20,765,591..20,927,050	-	shakB
X:20,780,150..20,781,220	-	CG32507
X:20,822,146..20,825,641	+	CG15450
X:20,867,989..20,869,397	-	CG1314
X:20,881,814..20,882,626	-	I-3
X:20,930,972..20,933,559	-	CG11227
X:20,934,869..20,939,503	+	Npc1b
X:20,962,605..20,963,505	-	Ser6
X:20,964,527..20,965,419	-	CG1304
X:20,978,286..20,978,868	+	CG44426
X:20,984,686..20,985,246	+	CG11666
X:21,023,390..21,025,888	-	r-cup
X:21,026,125..21,028,361	-	CG1532
X:21,028,652..21,031,950	-	CG1529
X:21,035,469..21,039,543	+	Ntf-2
X:21,039,514..21,040,605	-	CG15449
X:21,042,485..21,044,107	+	Mgstl
X:21,045,138..21,049,096	+	Cbs
X:21,049,964..21,053,937	-	Stt3A
X:21,053,963..21,078,937	+	bves
X:21,062,277..21,067,540	-	CG32512
X:21,093,844..21,111,417	+	stg1
X:21,093,844..21,111,417	+	CG11566
X:21,099,351..21,102,206	-	CG15446
X:21,104,863..21,106,369	-	CG1503
X:21,111,414..21,116,507	-	unc
X:21,117,161..21,120,333	+	CG15445
X:21,123,634..21,140,951	+	CG34120
X:21,146,281..21,147,041	-	CG45154
